# Supplementary material for: Excellent power generation and enhanced mechanical properties in PPT-structured Pb-free piezoceramics with ZrO2 inclusions
Source: Royal Society of Chemistry journal article supplement (doi:10.1039/d2tc02468c), 2022-01-01
Supplement: d2tc02468c1.pdf [file d2tc02468c1.pdf]

### Support Information

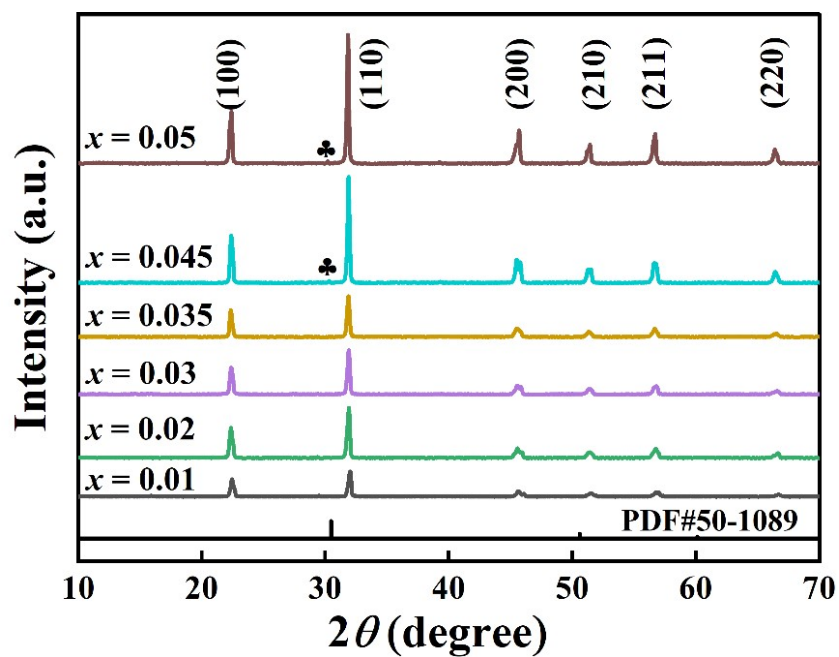

**Fig. S1** The XRD patterns of the  $\text{ZrO}_2/(1-x)\text{KNNS}-x\text{BNZ}$  ceramics with different  $x$  contents:  $x = 0.01$ ,  $x = 0.02$ ,  $x = 0.03$ ,  $x = 0.035$ ,  $x = 0.045$  and  $x = 0.05$ .

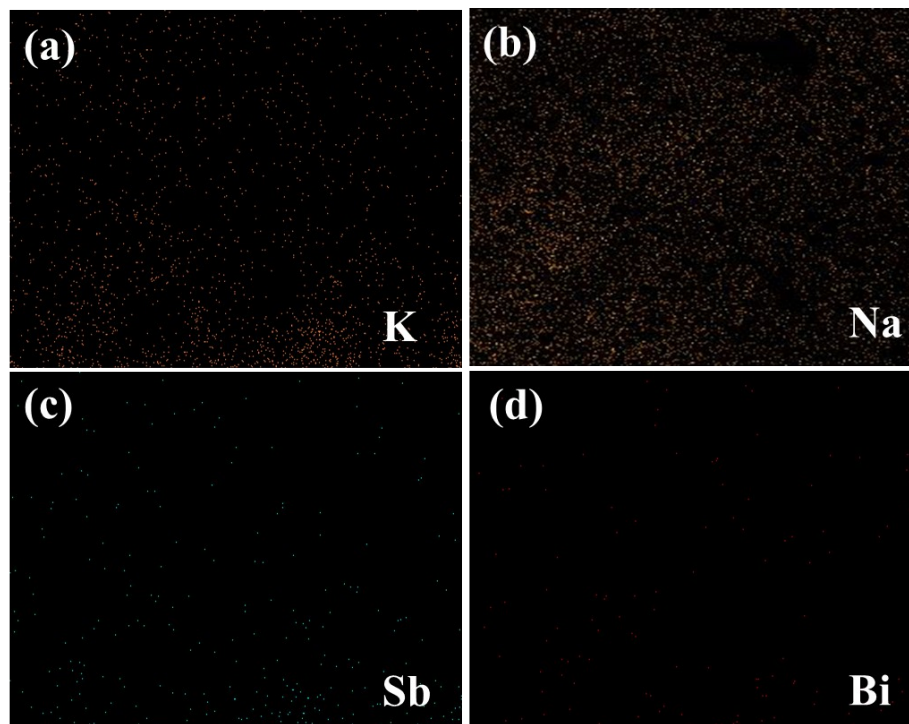

**Fig. S2** Corresponding element distribution mapping of  $x = 0.04$  ceramics.

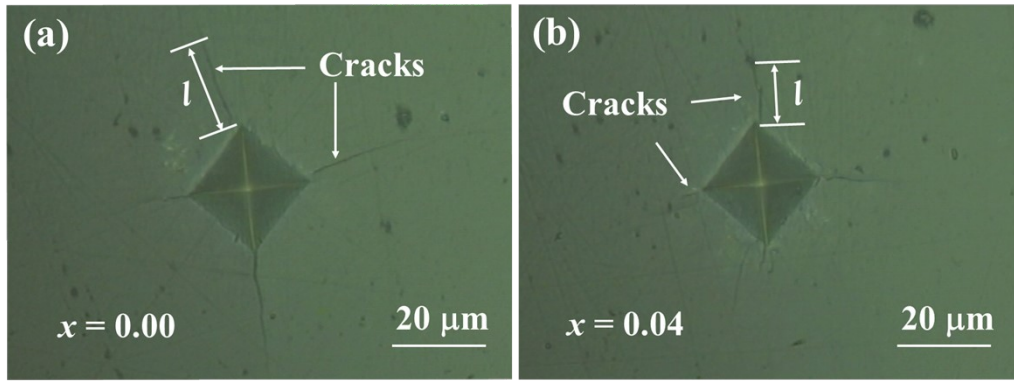

**Fig. S3** (a-b) The Vickers indentation and cracks of (1-x)KNNS-xBNZ ceramics with  $x = 0.00$  and  $x = 0.04$ .

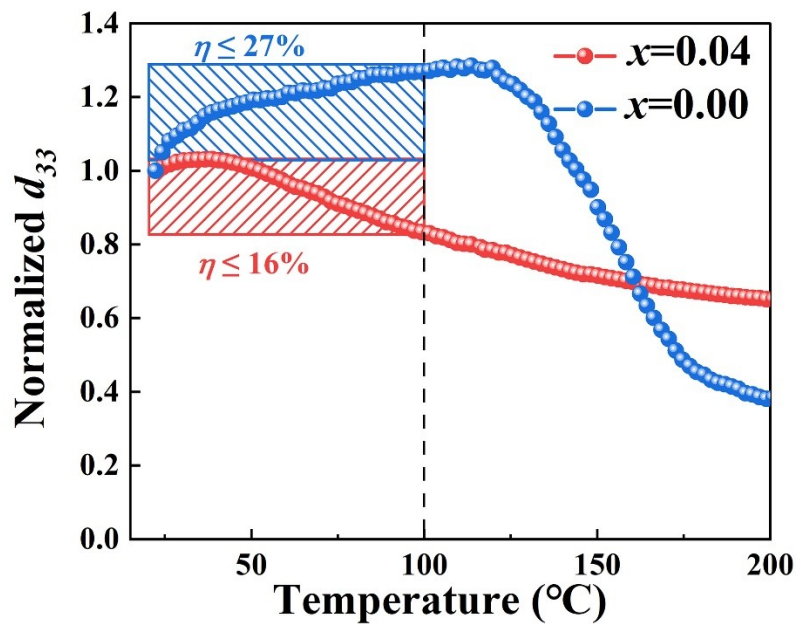

**Fig. S4** The normalized *in situ*  $d_{33}$  as a function of the temperature for  $x = 0.00$  and  $x = 0.04$  samples.

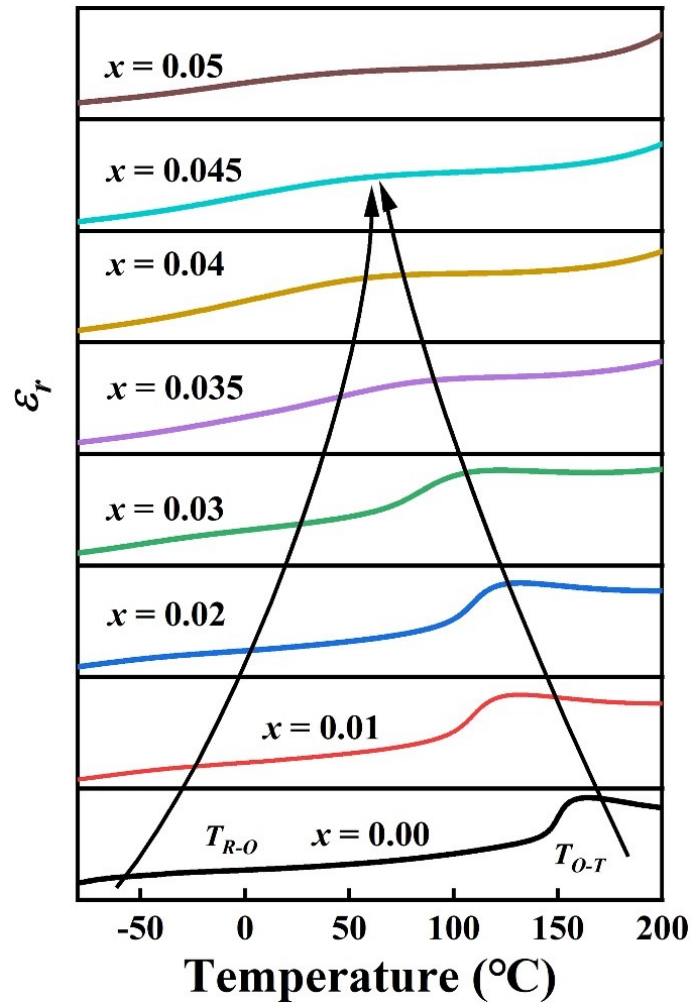

Fig. S5 The  $\epsilon_r$ - $T$  curves of  $(1-x)\text{KNNs}-x\text{BNZ}$  ceramics measured between  $-80$ - $200$  °C.

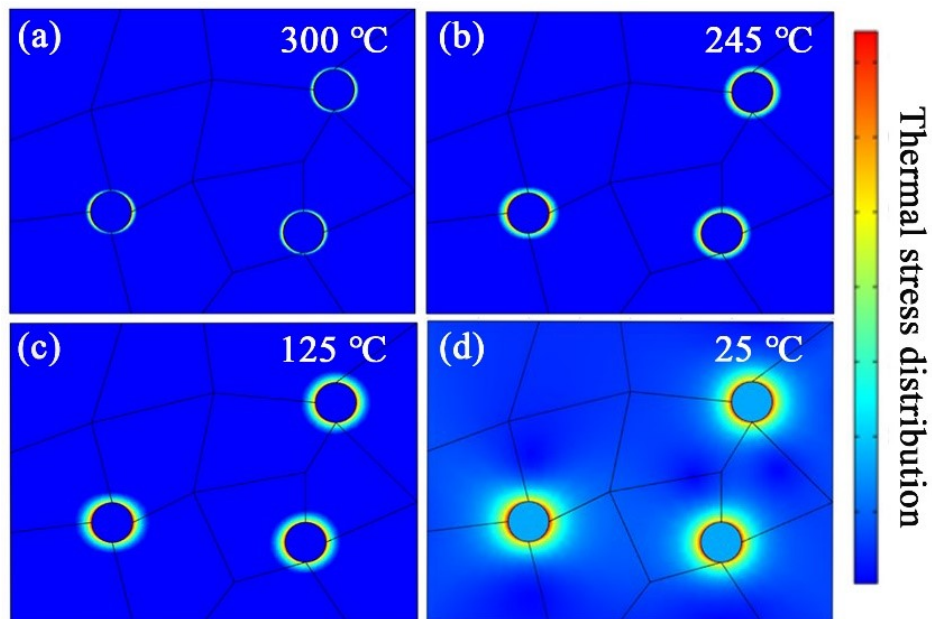

Fig. S6 The stress distribution of the  $x = 0.04$  sample between the KNN-based ceramics and  $\text{ZrO}_2$  at different temperature.

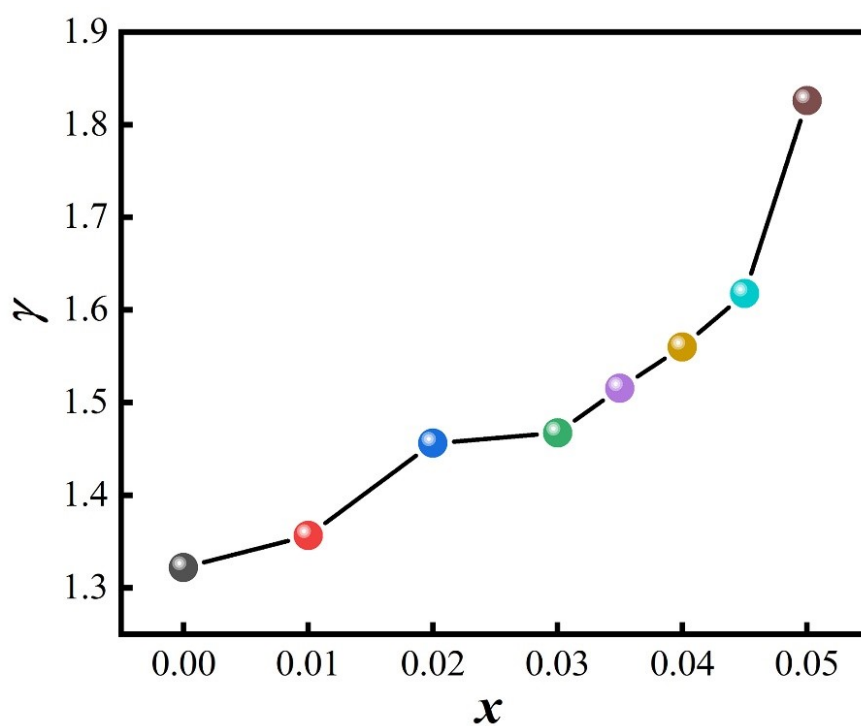

Fig. S7 The diffusion factor  $\gamma$  as a function of  $x$ .

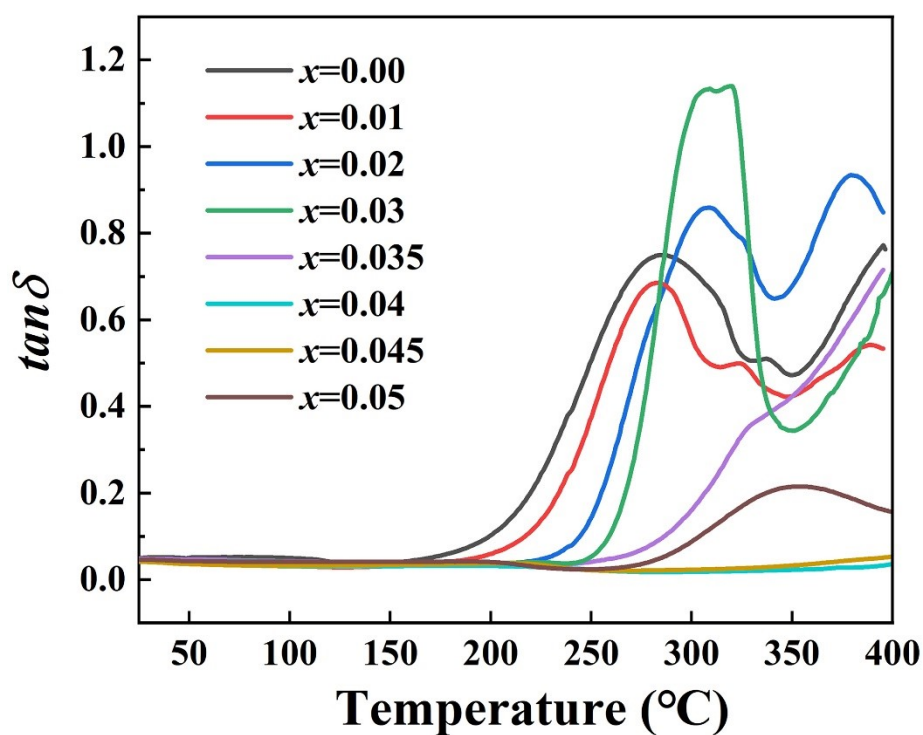

Fig. S8 The temperature dependence of  $\tan\delta$  measured from 25-400 °C of all samples.

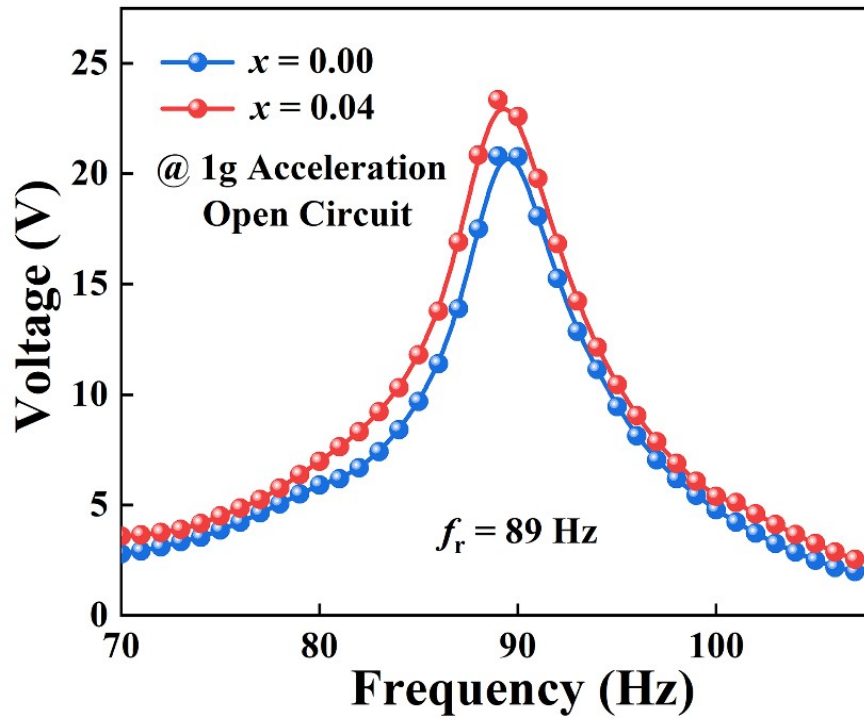

**Fig. S9** The relationship between the open circuit voltage ( $V_{\text{open}}$ ) and frequency of the cantilever PEH prepared by the  $x = 0.00$  and  $x = 0.04$  samples.
